# Supplementary material
Source: publisher site journal article supplement (http://static.cambridge.org/content/id/urn:cambridge.org:id:article:S0033822219001498/resource/name/S0033822219001498supp002.docx)
Supplement: Supplementary file 1 [file S0033822219001498supp002.docx]

Supplemental Table S1   Summary of the seven ceramic periods (CP) defined by Petersen and Sanger based on attribute analysis.

| CP (Date Range) | Characteristic Attributes States | Possible But Not Characteristic | Main Variables |
| --- | --- | --- | --- |
| CP1 (3050–2150 BP) | - Fabric impressed or paddled - Conoidal shape - Grit temper, not standardized - Fabric impression on both surfaces - Round lip - 4 ltrs or smaller capacity | - Beaker shape - Partially smoothed - Incised with a design - Punctates | - Z-twist (coastal) or S-twist (non-coastal) - Conoidal- or beaker-shaped |
| CP2 (2150–1650 BP) | - Linear-stamp impressed (pseudo-scallop shell, dentate, or unnotched) - Smoothed on exterior and interior surfaces - Grit-tempered - Conoidal - Thinner compared with CP1 and CP3 ceramics - Elaborately decorated | - Incised, usually as a secondary decoration - Decorated with punctates, unstandardized - Decorated with oblique (right or left) elements - Scraped (“channeling”) on the interior surface - Castellations | - Pseudo-scallop shell, dentate, unnotched - Oblique left or right incision and linear stamps - Rocker- or simple-stamped |
| CP3 (1650–1350 BP) | - Grit-tempered - Fabric-paddled but interiors were smoothed—some vessels were apparently left this way, making them resemble the vessels of CP1 - Conoidal - Larger dentate size compared with CP2 - Thicker necks compared with CP2 - Introduction of low collars - Increased vessel size from CP2 - Rocker stamping | - Shell-tempered (extremely rare or unlikely) - Decorated with cord-wrapped stick (extremely rare or unlikely) - Decorated with punctates (unstandardized) | - Punctate shape, ranging from round to linear - Presence/absence of collars - Rocker- or simple-stamped, but rocker-stamping more common |
| CP4 (1350–950 BP) | - Conoidal shape - Cord impressions - Absence of rocker stamping after mid-CP4 - Decoration mainly on the upper body, with the lower body left undecorated - Cylindrical (circular) punctates, fairly uniform in size, discretely spaced - If incised or trailed, usually occurs with cylindrical punctates | - Low (“additive”) collars or thickened rims - Dentate stamping - Shell temper (not widespread) | - Simple-, rocker-, or drag-stamping - 4 to 8 ltrs - Incision or trailing - Punctates: cylindrical, linear, or crescent (fingernail) - Smoothed or fabric-paddled exterior surfaces - Grit- or shell-tempered |
| CP5 (950–650 BP) | - Conoidal - Cord-wrapped stick decorations - Dominant use of shell temper - Discontinued use of rocker- and drag-stamping - Discontinued use of dentate in some areas - Cord-wrapped stick applied with vertical simple stamping - Cord marks and punctate diameters decreased compared with CP4 - Shell temper almost always associated with Z-twist cord markings in the Gulf of Maine area - Coiling is more easy to spot in CP5 ceramics | - Linear punctates - Incision - Fabric-paddled surface in some areas - Shell temper (very widespread) | - Surface finish is smoothed, smoothed-over fabric paddling, or fabric paddled surfaces - Grit- or shell-tempered - Conoidal or globular (the latter only at the end and possibly only after CP6) |
| CP6 (650–400 BP) | - Introduction of globular shapes - Dramatically thinner vessels compared to CP5 - Disappearance of circular punctates - More “Iroquoian” in appearance, especially in westernmost regions of the Far Northeast - “Extrusive” collars with decorations (punctates, cord markings, dentates, and incision) in southern areas - Vessel bodies almost always undecorated - Necks smoothed, bodies unsmoothed and fabric impressed | - Fabric paddled | - Grit- or shell-tempered - Cord-wrapped stick, dentate, “shell,” and punctate |
| CP7 (400–200 BP) | - Only appears in more southerly regions - Historic Period - Thin-walled - A range of new forms, including plates | - Collars - Fabric-paddled | - Grit- or shell-tempered - Dentate or cord-wrapped stick |
